# Supplementary material for: Anchoring 0D Cd0.5Zn0.5S nanoparticles on a 3D porous N-doped Ti3C2Tx MXene matrix for efficient photocatalytic hydrogen evolution
Source: Royal Society of Chemistry journal article supplement (doi:10.1039/d3tc01752d), 2023-01-01
Supplement: d3tc01752d1.pdf [file d3tc01752d1.pdf]

## **Anchoring 0D Cd<sub>0.5</sub>Zn<sub>0.5</sub>S nanoparticles on 3D porous N-doped Ti<sub>3</sub>C<sub>2</sub>T<sub>x</sub> MXene matrix for efficient photocatalytic hydrogen evolution**

Ming Du<sup>1</sup>, Shilei Ji<sup>1</sup>, Canhui Qian<sup>2</sup>, Lutao Li<sup>1</sup>, Wei Chen<sup>3</sup>, Huajie Huang<sup>4</sup>, Jianping Yang<sup>2</sup>, Jian Zhang<sup>1,2\*</sup>, Xinbao Zhu<sup>5</sup>, Xing'ao Li<sup>1,2,6\*</sup>

\* Corresponding author E-mail address: iamjzhang@njupt.edu.cn; lixa@njupt.edu.cn

1 New Energy Technology Engineering Lab of Jiangsu Province, College of Science, Nanjing University of Posts & Telecommunications (NUPT), Nanjing 210023, P. R. China

2 State Key Laboratory of Organic Electronics and Information Displays and Institute of Advanced Materials (IAM), Nanjing University of Posts and Telecommunications (NUPT), Nanjing 210023, Jiangsu, P. R. China

3 School of Pharmaceutical and Chemical Engineering, Taizhou University, Jiaojiang 318000, Zhejiang Province, P. R. China

4 College of Mechanics and Materials, Hohai University, Nanjing 210098, P. R. China.

5 College of Chemical Engineering, Nanjing Forestry University, Nanjing 210037, P. R. China.

6 School of Physics and Electronic Engineering, Hainan Normal University, Haikou, Hainan 571158, P. R. China

Present address: Nanjing University of Posts and Telecommunications Xianlin Campus, 9# Wenyuan Road, Qixia District, Nanjing

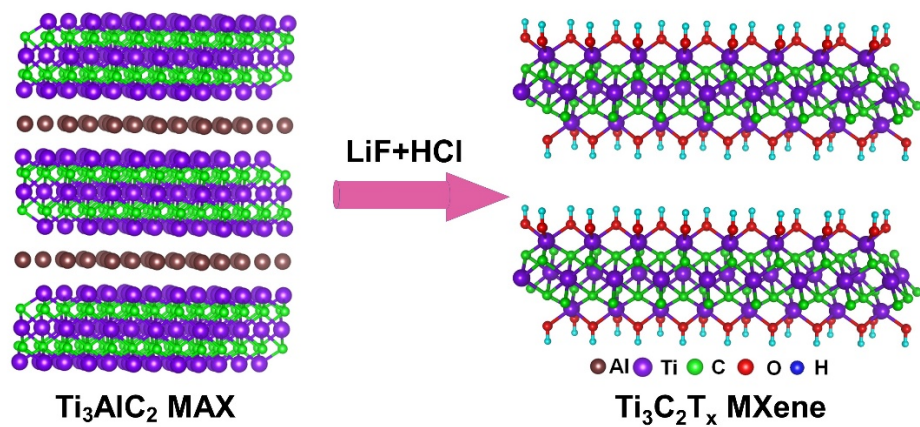

Fig. S1 Schematic illustration for the fabrication of  $\text{Ti}_3\text{C}_2\text{T}_x$  MXene nanoflakes.

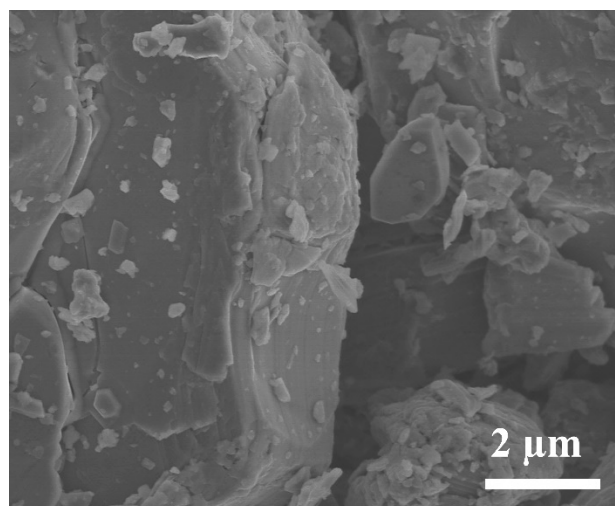

Fig. S2 SEM images of bulk  $\text{Ti}_3\text{AlC}_2$  MAX.

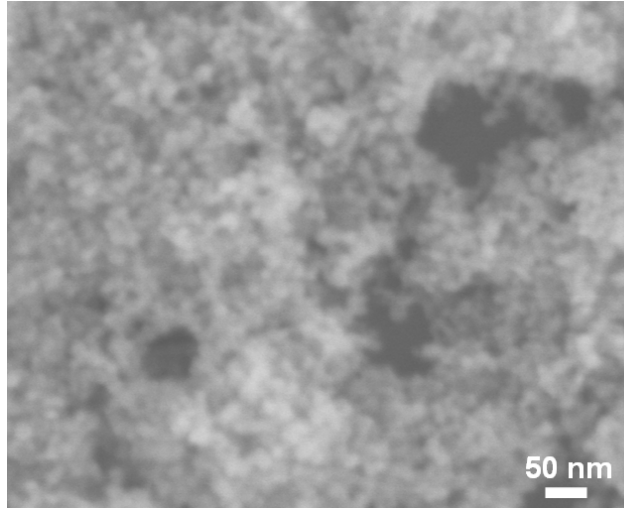

Fig. S3 SEM images of CZS nanoparticles.

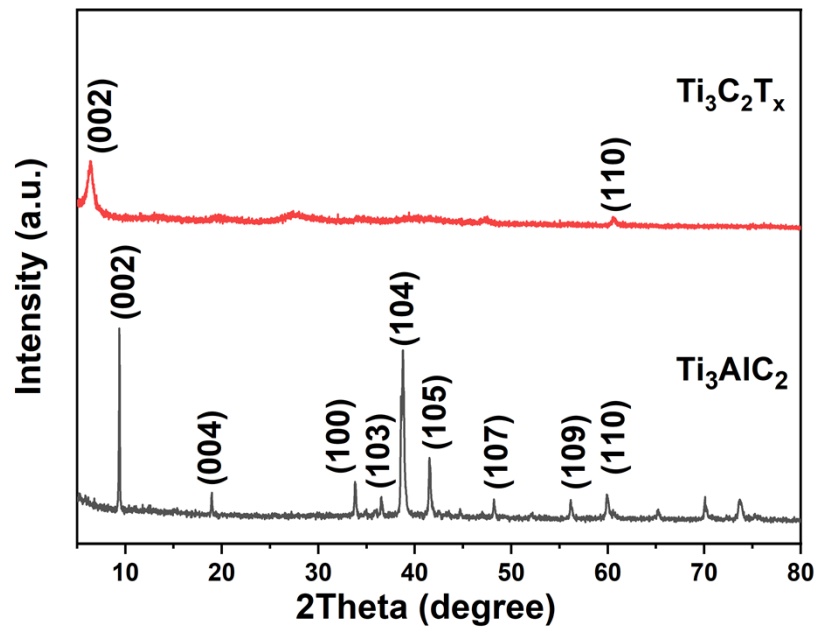

Fig. S4 XRD patterns of the Ti<sub>3</sub>AlC<sub>2</sub> MAX and the fabrication of Ti<sub>3</sub>C<sub>2</sub>T<sub>x</sub> MXene.

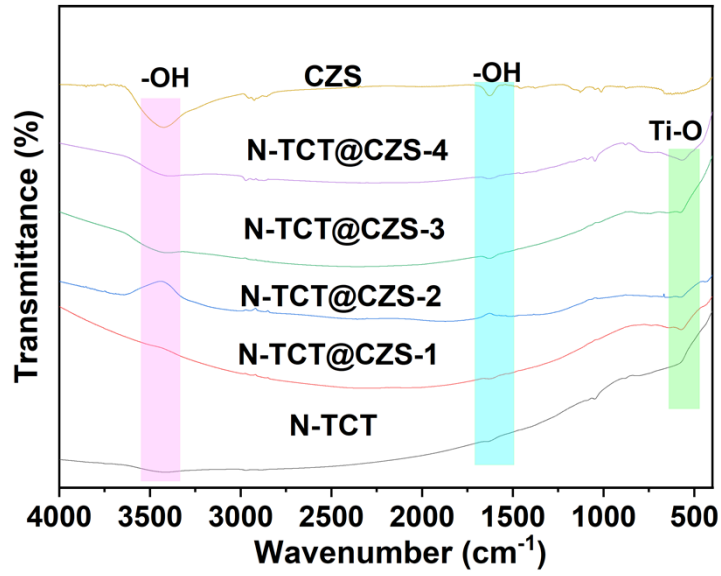

Fig. S5. FT-IR spectra of CZS, N-TCT@CZS composites, and N-TCT.

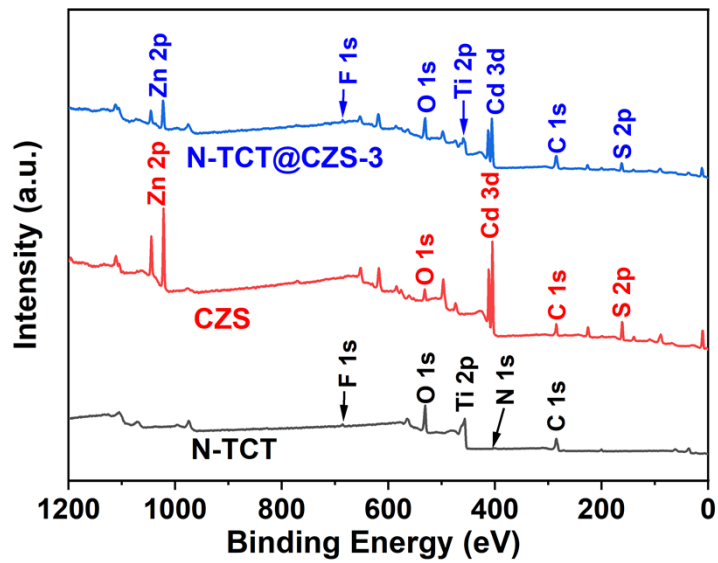

Fig. S6 XPS survey spectra of CZS, N-TCT MXene and N-TCT@CZS-3.

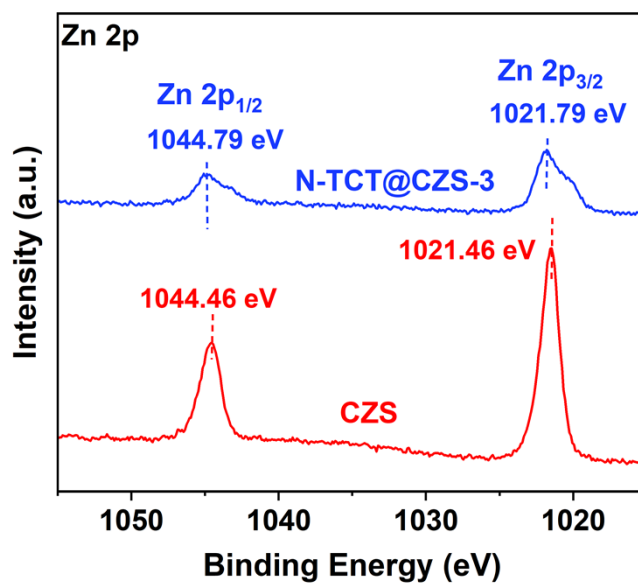

Fig. S7 High-resolution XPS spectra of Zn 2p.

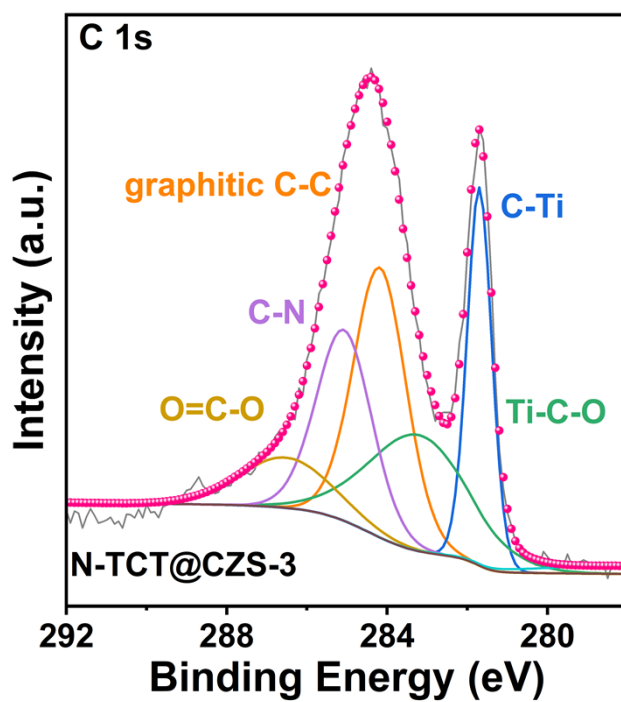

Fig. S8 High-resolution XPS spectra of C 1s.

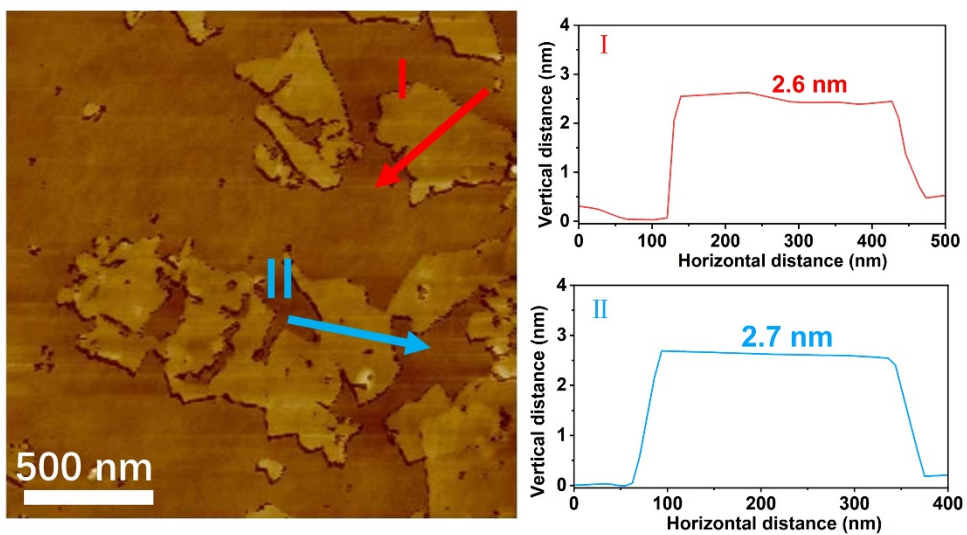

Fig. S9 AFM images of TCT MXene nanoflakes.

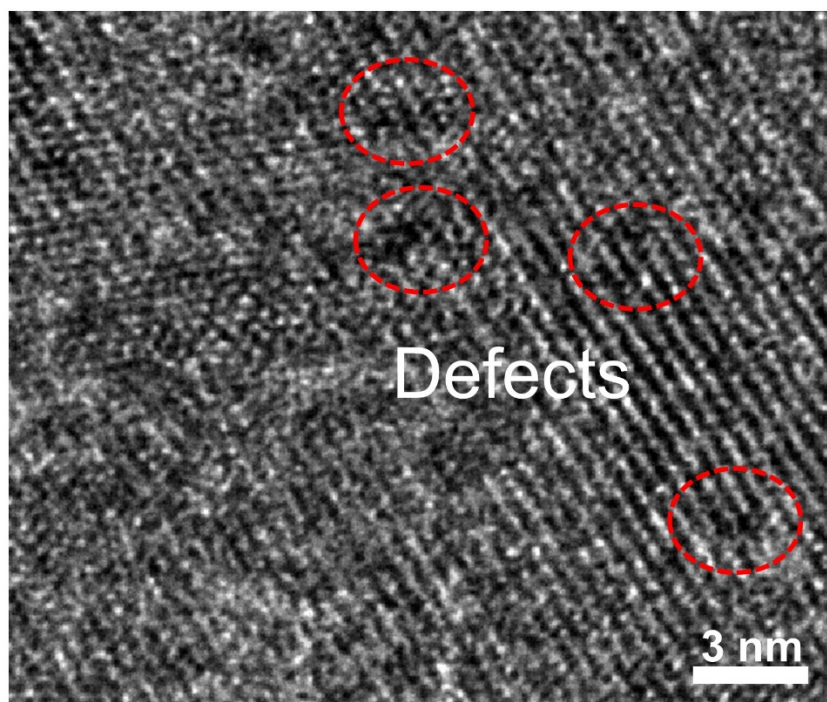

Fig. S10 the local magnification of HRTEM images of TCT MXene nanoflakes.

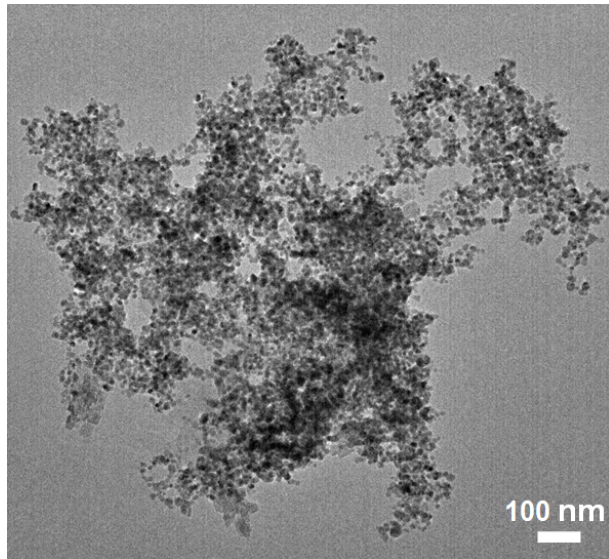

Fig. S11 TEM images of CZS nanoparticles.

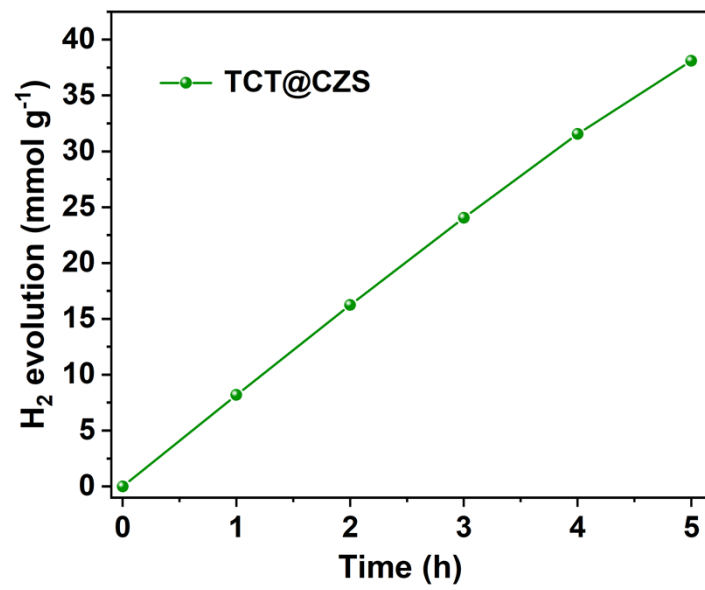

Fig. S12 The photocatalytic hydrogen evolution rate of TCT@CZS

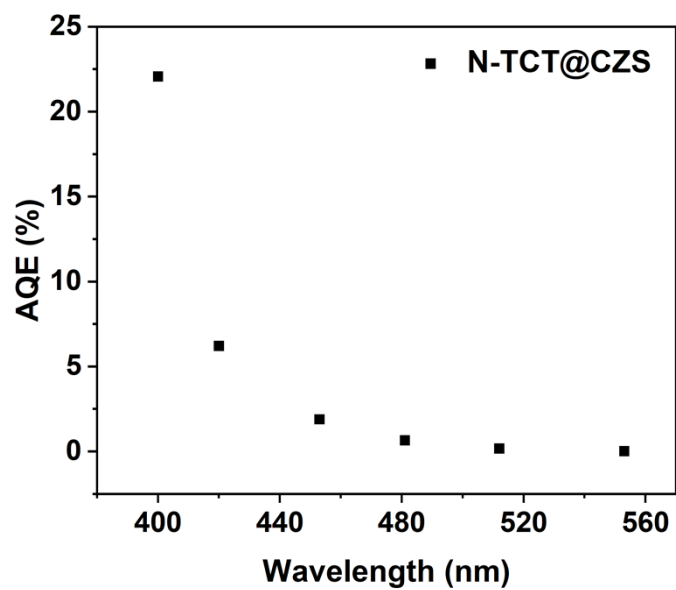

Fig. S13 The AQE values of N-TCT@CZS at different wavelength.

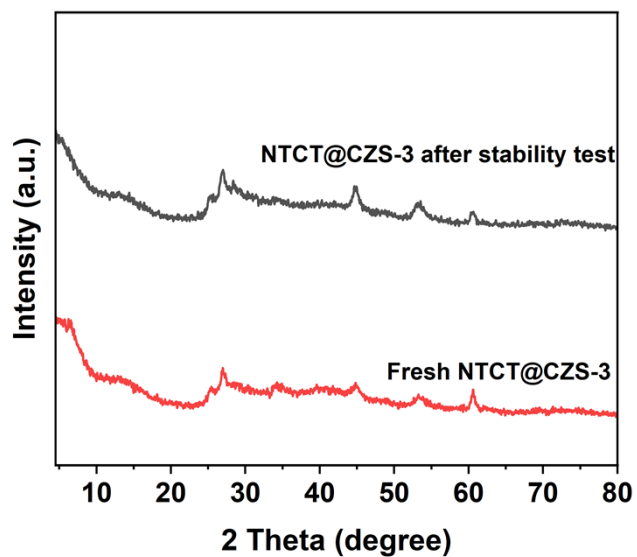

Fig. 14 XRD patterns of N-TCT@CZS-3 before and after stability test.



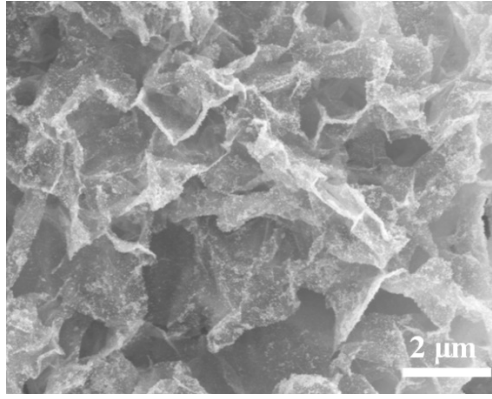

Fig. 15 SEM of N-TCT@CZS-3 after stability test.

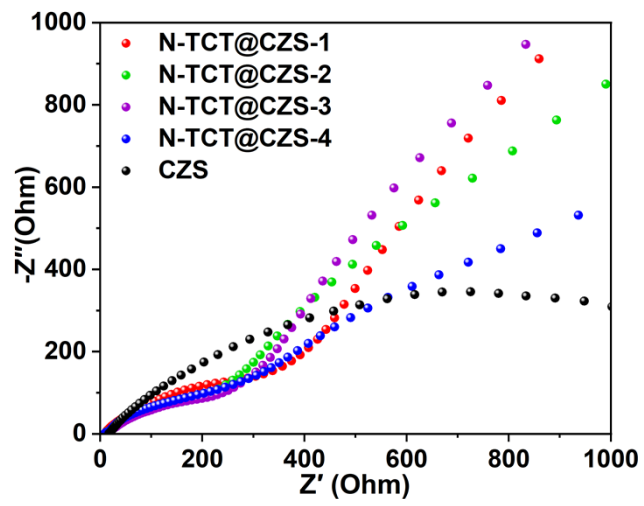

Fig. 16 SEM of N-TCT@CZS-3 after stability test.

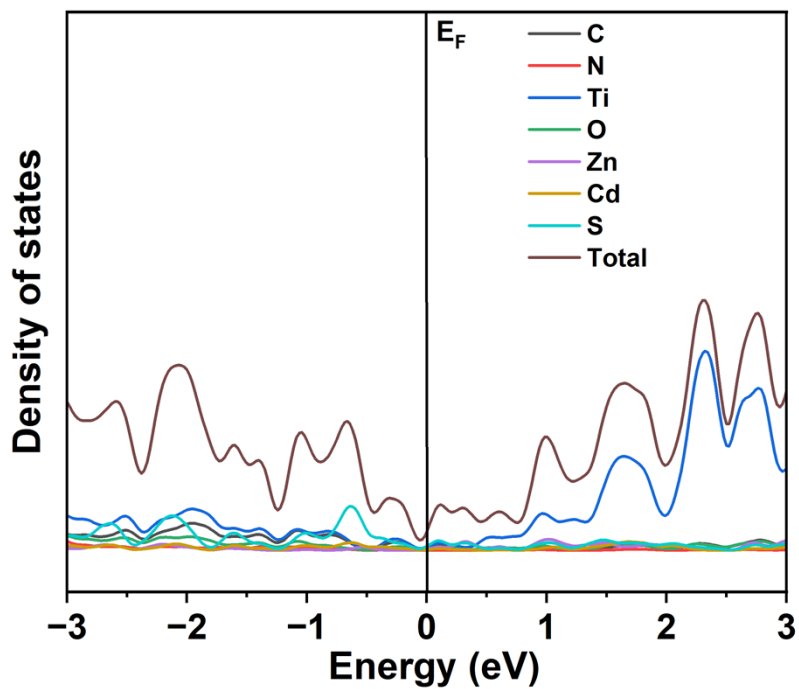

Fig. S17. The density of states of the N-TCT@CZS.

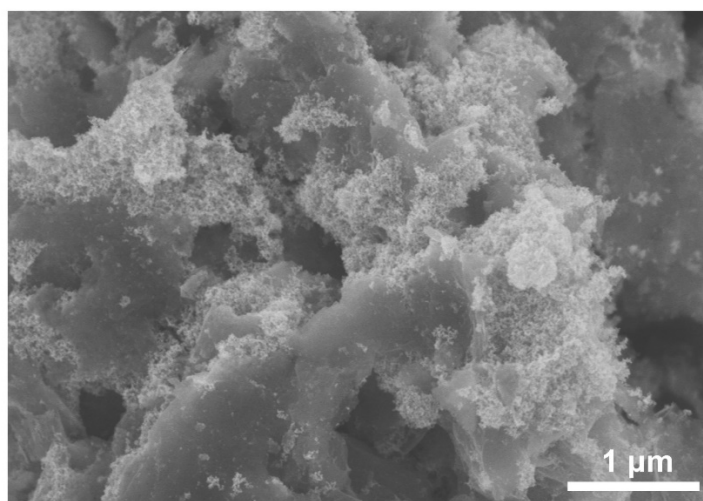

Fig. S18. The SEM of the TCT@CZS (TCT: CZS= 4: 1).

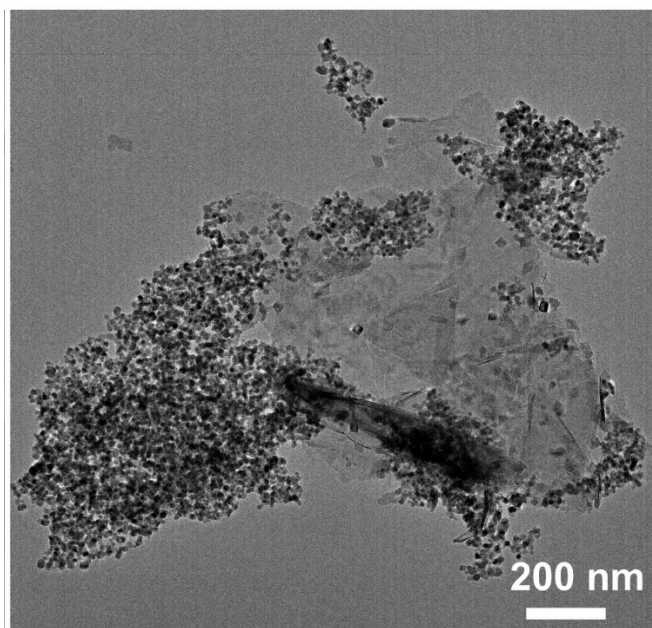

Fig. S19. The TEM of the TCT@CZS (TCT: CZS=4:1).

Table S1. Comparison of the photocatalytic H<sub>2</sub> evolution activity for some previous reports MXene-based photocatalysts

| Photocatalyst                                            | Light source              | sacrificial agent                                 | H <sub>2</sub> evolution rate (mmol h <sup>-1</sup> g <sup>-1</sup> ) | H <sub>2</sub> production AQE (%) | Ref. |
|----------------------------------------------------------|---------------------------|---------------------------------------------------|-----------------------------------------------------------------------|-----------------------------------|------|
| MXene/ZnIn <sub>2</sub> S <sub>4</sub>                   | 300 W Xe lamp (λ≥400 nm)  | triethanolamine                                   | 3.475                                                                 | 11.14 (λ=420 nm)                  | 1    |
| MXene/CdS                                                | 300 W Xe lamp (λ≥420 nm)  | benzylamine                                       | 0.220                                                                 | None                              | 2    |
| MXene/CdS/Au                                             | 300 W Xe lamp (λ≥400 nm)  | lactic acid                                       | 5.371                                                                 | 16.70 (λ=420 nm)                  | 3    |
| MXene/Ru/g-C <sub>3</sub> N <sub>4</sub>                 | 300 W Xe lamp (λ≥380 nm)  | TEOA                                              | 3.21                                                                  | 30.9 (λ=380 nm)                   | 4    |
| MXene/TiO <sub>2</sub>                                   | 300 W Xe lamp (λ≥380 nm)  | TEOA                                              | 4.672                                                                 | 27.11 (λ=380 nm)                  | 5    |
| MXene/UiO-66-NH <sub>2</sub> (Zr/Ti)                     | 300 W Xe lamp (λ≥400 nm)  | TEOA                                              | 2.187                                                                 | None                              | 6    |
| MXene/CdS/C                                              | 300 W Xe lamp             | TEOA                                              | 5.64                                                                  | 45.70 (λ=450 nm)                  | 7    |
| MXene/ZnIn <sub>2</sub> S <sub>4</sub>                   | 300 W Xe lamp (λ≥400 nm)  | Na <sub>2</sub> S/Na <sub>2</sub> SO <sub>3</sub> | 3.058                                                                 | 17.68 (λ=420 nm)                  | 8    |
| MXene@TiO <sub>2</sub> /ZnIn <sub>2</sub> S <sub>4</sub> | 350 W Xe lamp (λ≥420 nm). | Na <sub>2</sub> S/Na <sub>2</sub> SO <sub>3</sub> | 1.18                                                                  | None                              | 9    |
| MXene/TiO <sub>2</sub> /Ru                               | 300 W Xe lamp (λ≥350 nm). | TEOA                                              | 0.235                                                                 | 14.33 (λ=350 nm)                  | 10   |
| MXene@TiO <sub>2</sub> @MoS <sub>2</sub>                 | 300 W Xe lamp (λ≥400 nm)  | TEOA                                              | 6.425                                                                 | 4.61 (λ=400 nm)                   | 11   |
| MXene@TiO <sub>2</sub> @WS <sub>2</sub>                  | 300 W Xe lamp             | TEOA                                              | 3.409                                                                 | 2.464                             | 12   |

|                                             |                                                  |                                                   |       |                                     |           |
|---------------------------------------------|--------------------------------------------------|---------------------------------------------------|-------|-------------------------------------|-----------|
|                                             |                                                  |                                                   |       | ( $\lambda=400\text{nm}$ )          |           |
| MXene/g-C <sub>3</sub> N <sub>4</sub>       | 300 W Xe lamp<br>( $\lambda\geq 400\text{ nm}$ ) | TEOA                                              | 5.111 | 3.654<br>( $\lambda=400\text{nm}$ ) | 13        |
| MXene/TiO <sub>2</sub> /PtO                 | 300 W Xe lamp<br>( $\lambda\geq 420\text{ nm}$ ) | methanol                                          | 2.54  | 4.2<br>( $\lambda=365\text{nm}$ )   | 14        |
| MXene/CdS                                   | 300 W Xe lamp<br>( $\lambda\geq 400\text{ nm}$ ) | methanol                                          | 4.235 | 2.28<br>( $\lambda=400\text{nm}$ )  | 15        |
| MXene/CdSe                                  | 300 W Xe lamp<br>( $\lambda\geq 400\text{ nm}$ ) | Na <sub>2</sub> S/Na <sub>2</sub> SO <sub>3</sub> | 0.763 | 1.30<br>( $\lambda=400\text{nm}$ )  | 16        |
| MXene/Cd <sub>0.5</sub> Zn <sub>0.5</sub> S | 300 W Xe lamp<br>( $\lambda\geq 400\text{ nm}$ ) | Na <sub>2</sub> S/Na <sub>2</sub> SO <sub>3</sub> | 10.90 | 22.07<br>( $\lambda=400\text{nm}$ ) | This work |

Table S2. Comparison of the photocatalytic H<sub>2</sub> evolution activity for some previous reports CdZnS-based photocatalysts

| Photocatalyst                                                                        | Light source                                      | sacrificial agent                                 | H <sub>2</sub> evolution rate (mmol h <sup>-1</sup> g <sup>-1</sup> ) | H <sub>2</sub> production AQE (%)   | Ref.      |
|--------------------------------------------------------------------------------------|---------------------------------------------------|---------------------------------------------------|-----------------------------------------------------------------------|-------------------------------------|-----------|
| Cd <sub>0.5</sub> Zn <sub>0.5</sub> S/CoPPi-M                                        | 300 W Xe lamp<br>( $\lambda\geq 400\text{ nm}$ )  | Na <sub>2</sub> S/Na <sub>2</sub> SO <sub>3</sub> | 6.87                                                                  | 20.7<br>( $\lambda=420\text{ nm}$ ) | 17        |
| PtSA-Cd <sub>0.5</sub> Zn <sub>0.5</sub> S                                           | 300 W Xe lamp<br>( $\lambda\geq 420\text{ nm}$ )  | Na <sub>2</sub> S/Na <sub>2</sub> SO <sub>3</sub> | 0.279                                                                 | None                                | 18        |
| Cd <sub>0.5</sub> Zn <sub>0.5</sub> S/Bi <sub>2</sub> Fe <sub>4</sub> O <sub>9</sub> | 300 W Xe lamp<br>( $\lambda\geq 420\text{ nm}$ )  | Na <sub>2</sub> S/Na <sub>2</sub> SO <sub>3</sub> | 0.811                                                                 | None                                | 19        |
| In <sub>2</sub> O <sub>3</sub> /CdZnS                                                | 300 W Xe lamp<br>( $\lambda\geq 380\text{ nm}$ )  | Na <sub>2</sub> S/Na <sub>2</sub> SO <sub>3</sub> | 1.11                                                                  | 30.9<br>( $\lambda=380\text{ nm}$ ) | 20        |
| Cu <sub>2</sub> S/CdZnS                                                              | 300 W Xe lamp<br>( $\lambda\geq 420\text{ nm}$ )  | Na <sub>2</sub> S/Na <sub>2</sub> SO <sub>3</sub> | 5.904                                                                 | 2.13<br>( $\lambda=400\text{ nm}$ ) | 21        |
| Cu-MOF/Cd <sub>0.5</sub> Zn <sub>0.5</sub> S                                         | 300 W Xe lamp<br>( $\lambda\geq 400\text{ nm}$ )  | Na <sub>2</sub> S/Na <sub>2</sub> SO <sub>3</sub> | 5.301                                                                 | None                                | 22        |
| Cd <sub>0.5</sub> Zn <sub>0.5</sub> S/CuInS <sub>2</sub>                             | 300 W Xe lamp                                     | Na <sub>2</sub> S/Na <sub>2</sub> SO <sub>3</sub> | 7.73                                                                  | 0.61<br>( $\lambda=420\text{ nm}$ ) | 23        |
| Ni/NiS/Zn <sub>0.2</sub> Cd <sub>0.8</sub> S                                         | 350 W Xe lamp<br>( $\lambda\geq 420\text{ nm}$ ). | lactic acid                                       | 4.151                                                                 | None                                | 24        |
| MXene/Cd <sub>0.5</sub> Zn <sub>0.5</sub> S                                          | 300 W Xe lamp<br>( $\lambda\geq 400\text{ nm}$ )  | Na <sub>2</sub> S/Na <sub>2</sub> SO <sub>3</sub> | 10.90                                                                 | 22.07<br>( $\lambda=400\text{nm}$ ) | This work |

## References

- 1 G. Zuo, Y. Wang, W. L. Teo, A. Xie, Y. Guo, Y. Dai, W. Zhou, D. Jana, Q. Xian and W. Dong, *Angewandte Chemie*, 2020, **132**, 11383-11388.
- 2 H. Wang, P. Hu, J. Zhou, M. B. Roeffaers, B. Weng, Y. Wang and H. Ji, *J. Mater. Chem. A*, 2021, **9**, 19984-19993.
- 3 Z. Li, W. Huang, J. Liu, K. Lv and Q. Li, *ACS Catal.*, 2021, **11**, 8510-8520.
- 4 W.-J. Yi, X. Du, M. Zhang, S.-S. Yi, R.-H. Xia, C.-Q. Li, Y. Liu, Z.-Y. Liu, W.-L. Zhang and X.-Z. Yue, *Nano Res.*, 2023, 1-9.

- 5 C. Peng, T. Zhou, P. Wei, H. Ai, B. Zhou, H. Pan, W. Xu, J. Jia, K. Zhang and H. Wang, *Chem. Eng. J.*, 2022, **439**, 135685.
- 6 L. Shi, C. Wu, Y. Wang, Y. Dou, D. Yuan, H. Li, H. Huang, Y. Zhang, I. D. Gates and X. Sun, *Adv. Funct. Mater.*, 2022, **32**, 2202571.
- 7 P. Wei, Y. Chen, T. Zhou, Z. Wang, Y. Zhang, H. Wang, H. Yu, J. Jia, K. Zhang and C. Peng, *ACS Catal.*, 2022, **13**, 587-600.
- 8 M. Du, L. Li, S. Ji, T. Wang, Y. Wang, J. Zhang and X. a. Li, *J. Mater. Chem. C*, 2022, **10**, 10636-10644.
- 9 K. Huang, C. Li and X. Meng, *J. Colloid Interface Sci.*, 2020, **580**, 669-680.
- 10 Y. Liu, Y.-H. Li, X. Li, Q. Zhang, H. Yu, X. Peng and F. Peng, *ACS Nano*, 2020, **14**, 14181-14189.
- 11 Y. Li, Z. Yin, G. Ji, Z. Liang, Y. Xue, Y. Guo, J. Tian, X. Wang and H. Cui, *Appl. Catal., B*, 2019, **246**, 12-20.
- 12 Y. Li, L. Ding, S. Yin, Z. Liang, Y. Xue, X. Wang, H. Cui and J. Tian, *Nano-Micro Lett.*, 2020, **12**, 1-12.
- 13 Y. Li, L. Ding, Y. Guo, Z. Liang, H. Cui and J. Tian, *ACS Appl. Mater. Interfaces*, 2019, **11**, 41440-41447.
- 14 J.-X. Yang, W.-B. Yu, C.-F. Li, W.-D. Dong, L.-Q. Jiang, N. Zhou, Z.-P. Zhuang, J. Liu, Z.-Y. Hu and H. Zhao, *Chem. Eng. J.*, 2021, **420**, 129695.
- 15 B. Sun, P. Qiu, Z. Liang, Y. Xue, X. Zhang, L. Yang, H. Cui and J. Tian, *Chem. Eng. J.*, 2021, **406**, 127177.
- 16 H. Gu, H. Zhang, X. Wang, Q. Li, S. Chang, Y. Huang, L. Gao, Y. Cui, R. Liu and W.-L. Dai, *Appl. Catal., B*, 2023, 122537.
- 17 L.-J. Gao, C.-C. Weng, Y.-S. Wang, X.-W. Lv, J.-T. Ren and Z.-Y. Yuan, *J. Colloid Interface Sci.*, 2022, **606**, 544-555.
- 18 B. Li, C. Guo, X. Wang, W. Dong, B. Xu, X. Xing, D. Zhou, X. Xue, Q. Luan and W. Tang, *Mater. Today Nano*, 2023, **21**, 100281.
- 19 H. Hua, F. Feng, M. Du, Y. Ma, Y. Pu, J. Zhang and X. a. Li, *Appl. Surf. Sci.*, 2021, **541**, 148428.
- 20 H. Yang, J. Tang, Y. Luo, X. Zhan, Z. Liang, L. Jiang, H. Hou and W. Yang, *Small*, 2021, **17**, 2102307.
- 21 G. Wang, Y. Quan, K. Yang and Z. Jin, *Journal of Materials Science & Technology*, 2022, **121**, 28-39.
- 22 P. Zhu, C. Feng, Q. Liang, M. Zhou, Z. Li and S. Xu, *Ceram. Int.*, 2023, **49**, 20706-20714.
- 23 F. Chen, J. Liao, X. Lu, Y. Xu, X. Jiang and M. Tian, *Appl. Surf. Sci.*, 2023, **621**, 156721.
- 24 Y. Sun, C. Xu, H. Ma, G. Li, L. Chen, Y. Sun, Z. Chen, P. Fang, Q. Fu and C. Pan, *Chem. Eng. J.*, 2021, **406**, 126878.
